# Supplementary material for: H-atom abstraction reaction for organic substrates via mononuclear copper(ii)-superoxo species as a model for DβM and PHM
Source: Royal Society of Chemistry journal article supplement (doi:10.1039/b712572k), 2007-11-26
Supplement: b712572k.pdf [file b712572k.pdf]

**Supporting Information for:**

**H-atom abstraction reaction for organic substrates *via*  
mononuclear copper(II)-superoxo species as a model of D $\beta$ M and  
PHM**

Tatsuya Fujii,<sup>a</sup> Syuhei Yamaguchi<sup>a</sup> Shun Hirota<sup>b</sup> and Hideki Masuda<sup>a\*</sup>

<sup>a</sup>Department of Applied Chemistry, Nagoya Institute of Technology, Showa-ku, Nagoya 466-8555, Japan. Fax: +81-52-735-5209; Tel: +81-52-735-5228; \*E-mail: [masuda.hideki@nitech.ac.jp](mailto:masuda.hideki@nitech.ac.jp)

<sup>b</sup> Graduate School of Material Science, Nara Institute of Science and Technology.

**Contents:**

- 1) The ESI-mass spectrum of complex **1**. **Fig. S1**
- 2) UV-vis spectra of the reaction of **1** with O<sub>2</sub>. **Fig. S2**
- 3) Concentration dependence of the decomposition rate of **2**. **Fig. S3**
- 4) Calculation of the generation rate of **2**. **Fig. S4**
- 5) UV-vis spectra of the reaction of **2** with DMPO. **Fig. S5**
- 6) ESI-mass spectrum of the reaction of **1** with O<sub>2</sub> in the presence of DMPO. **Fig. S6**
- 7) Spectroscopic feature of the [Cu<sup>II</sup>(bnpa)(OOH)]<sup>+</sup> complex. **Fig. S7**
- 8) UV-vis spectra of the reaction of **2** with TMPO-H. **Fig. S8**
- 9) ESI-mass spectrum of the reaction of **1** with O<sub>2</sub> in the presence of TEMPO-H. **Fig. S9**
- 10) UV-vis spectral change of the reaction of **1** with O<sub>2</sub> in the presence of phenylhydrazine. **Fig. S10**
- 11) ESI-mass spectrum of the reaction of **1** with O<sub>2</sub> in the presence of phenylhydrazine. **Fig. S11**

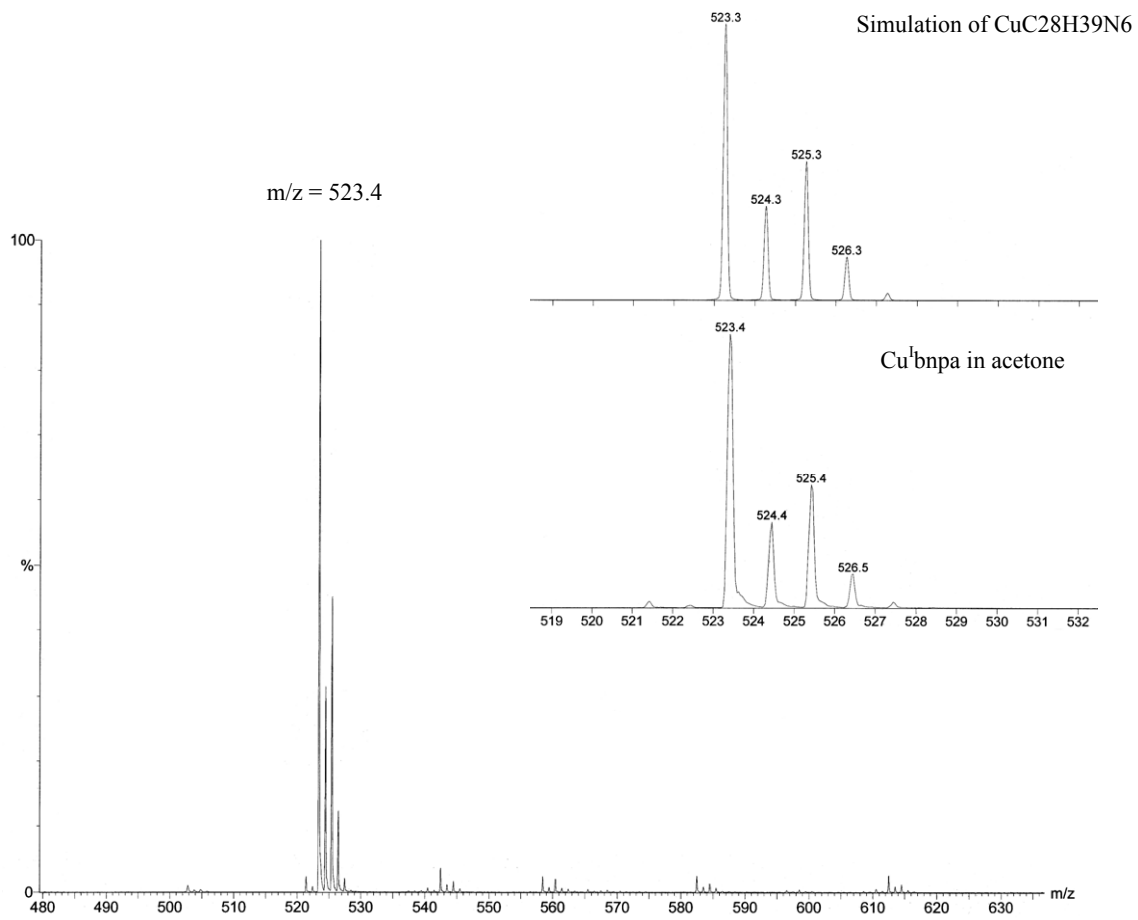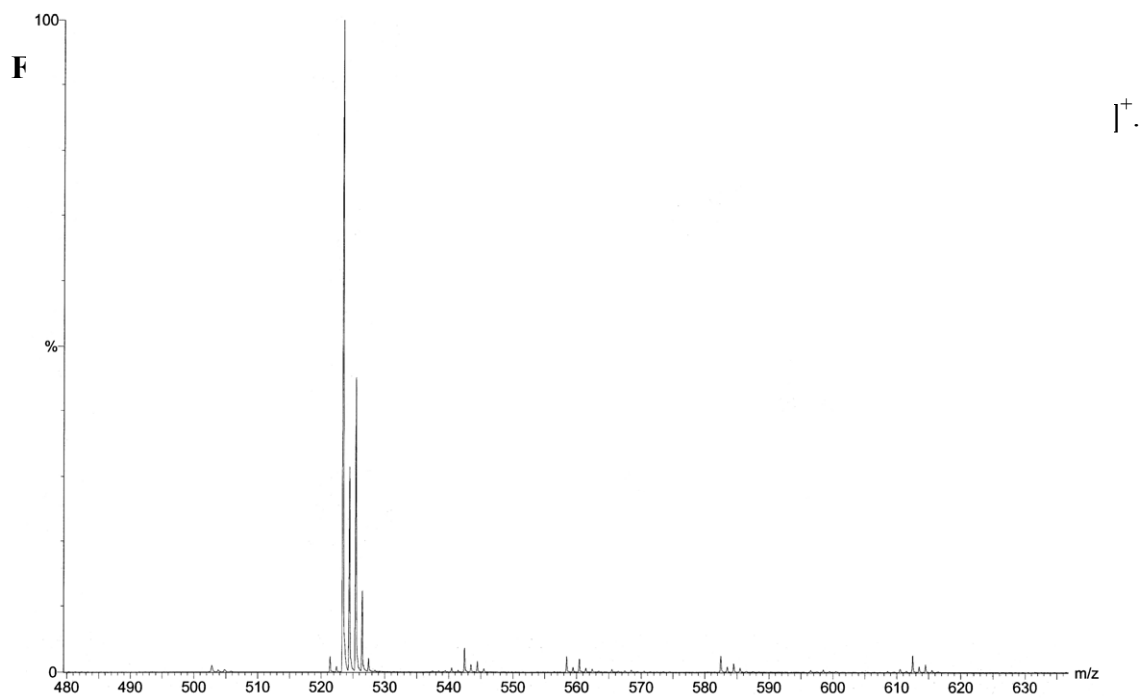

(a) MeOH solution

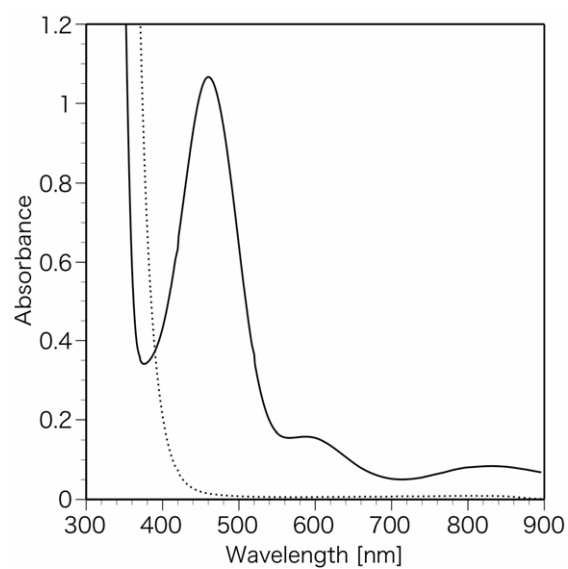

(b) THF solution

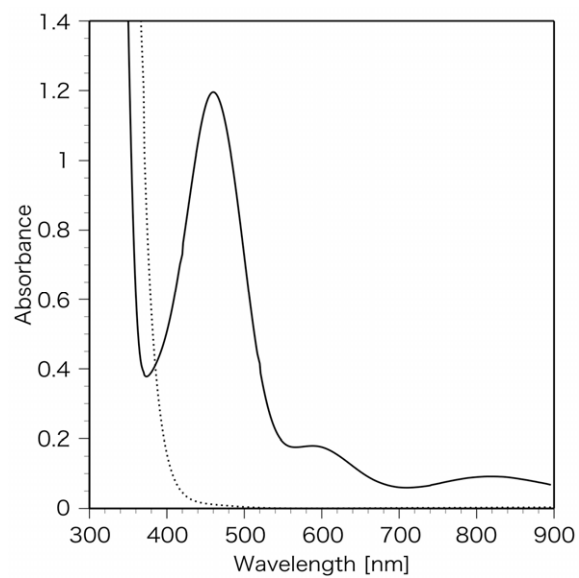

**Fig.S2** UV-vis spectral change of the reaction of **1** (0.5 mM) with O<sub>2</sub> in MeOH and THF solutions at -80 °C.

List of the characteristic LMCT band after bubbling O<sub>2</sub>

(a) 460 nm ( $\epsilon = 4270 \text{ M}^{-1}\text{cm}^{-1}$ ), 580 nm ( $\epsilon = 630 \text{ M}^{-1}\text{cm}^{-1}$ )

(b) 460 nm ( $\epsilon = 4780 \text{ M}^{-1}\text{cm}^{-1}$ ), 580 nm ( $\epsilon = 720 \text{ M}^{-1}\text{cm}^{-1}$ )

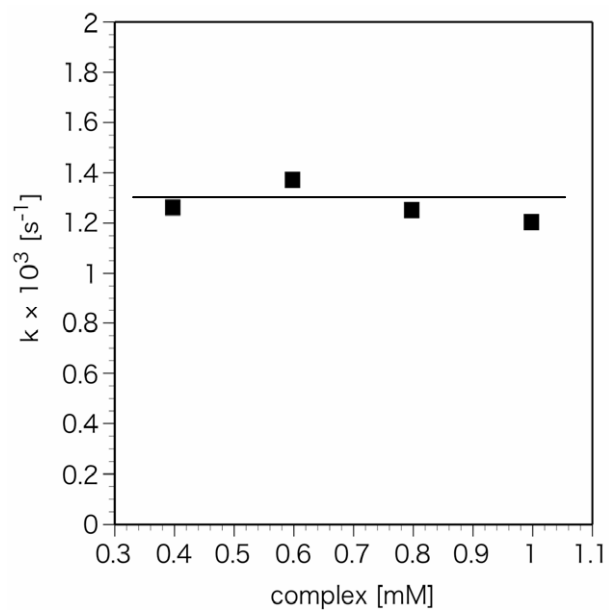

**Fig.S3** Plots of decomposition rates ( $k$ ) vs. concentrations of **1** in acetone at  $-20\text{ }^\circ\text{C}$ .

Decomposition process obeyed first-order kinetics.

$$k_1 = 1.26 \times 10^{-3} \text{ s}^{-1} : \text{complex } 0.4 \text{ mM}$$

$$k_2 = 1.37 \times 10^{-3} \text{ s}^{-1} : \text{complex } 0.6 \text{ mM}$$

$$k_3 = 1.25 \times 10^{-3} \text{ s}^{-1} : \text{complex } 0.8 \text{ mM}$$

$$k_4 = 1.20 \times 10^{-3} \text{ s}^{-1} : \text{complex } 1.0 \text{ mM}$$

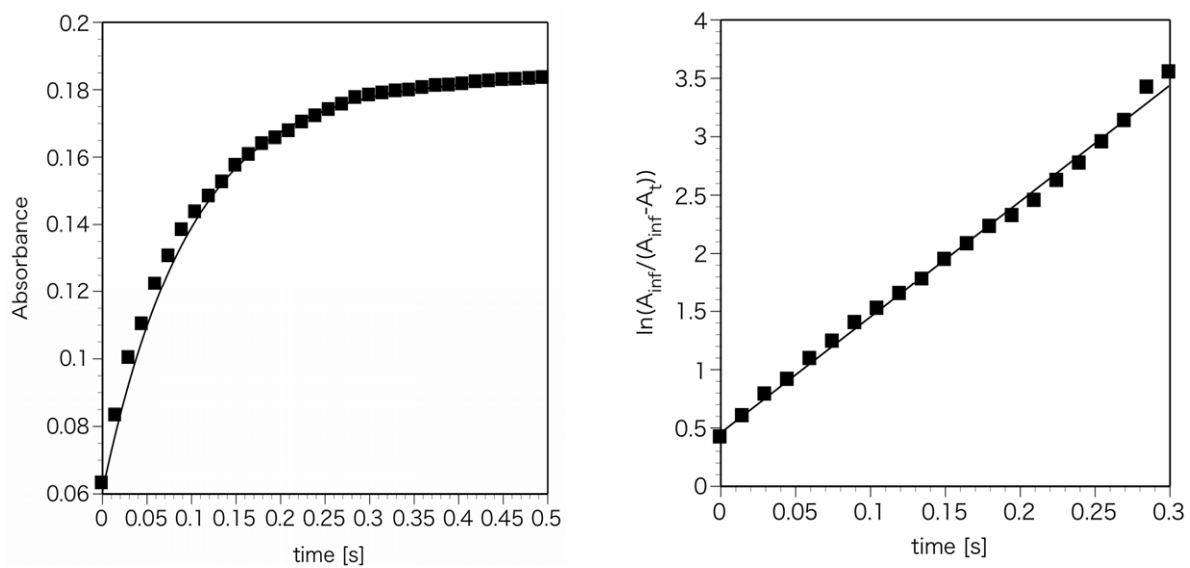

**Fig.S4** Estimation of the generation rate for the  $[\text{Cu}^{\text{II}}(\text{bnpa})(\text{O}_2^{2-})]^{2+}$  (**2**) in acetone (0.25 mM) at 10 °C. Time course of the absorption change at 460 nm and it's first-order fitting.

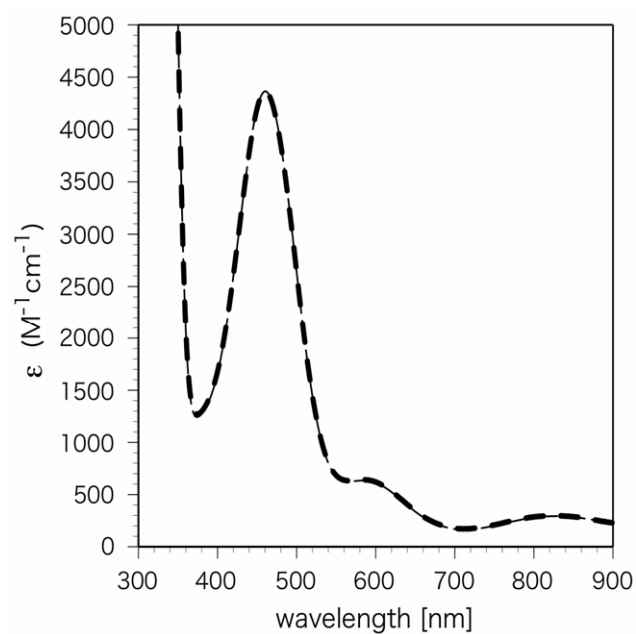

**Fig.S5** UV-vis spectral change of the reaction of **2** (0.5 mM) with DMPO (50 mM) in acetone solution at  $-80$  °C.

(a) solid line : Spectrum of the  $[Cu^{II}(bnpa)(O_2^{2-})]^{2+}$  (**2**) after bubbling Ar gas.

(b) dotted line : Spectrum of the solution after adding DMPO.

\* Reversibility was not observed by bubbling Ar gas in the solution of **2**.

\* Spectral change was not observed by adding DMPO.

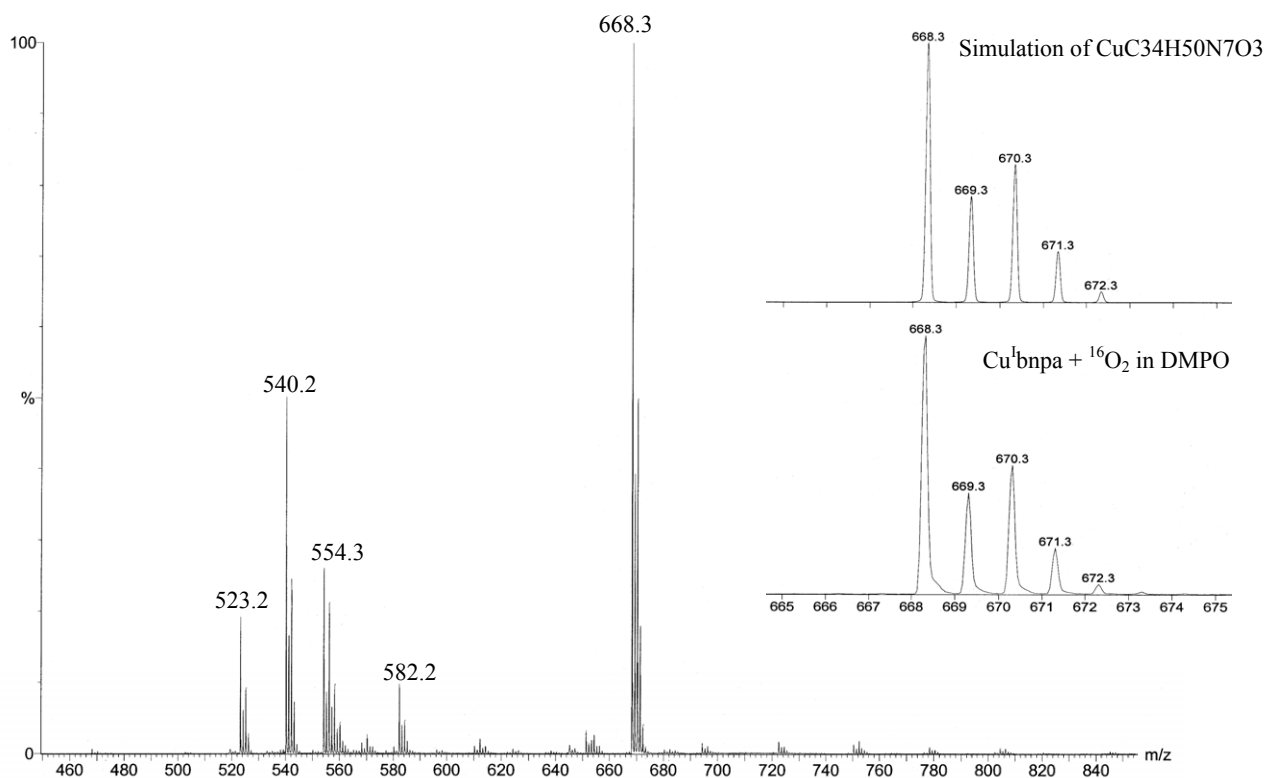

**Fig.S6(a)** ESI-mass spectra of the reaction solution of **1** with  $^{16}\text{O}_2$  in the presence of a large excess amount of DMPO in acetone. (inset) Comparison of the parent peak and isotope simulation of  $[\text{Cu}^{\text{II}}(\text{bnpa})(^{16}\text{O}_2^-)(\text{DMPO})]^+$ .

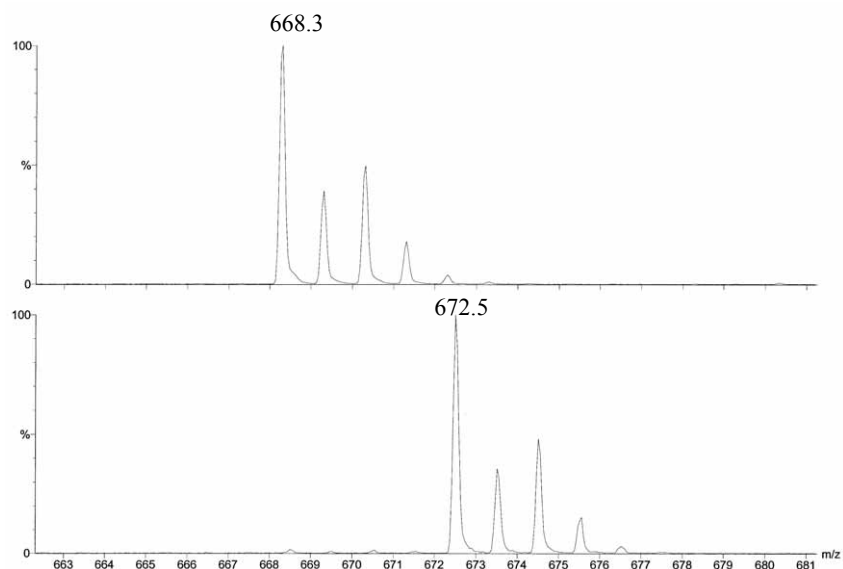

**Fig.S6(b)** Comparison of the ESI-mass spectra for the reaction solution of **1** with  $^{16}\text{O}_2$  and  $^{18}\text{O}_2$  in the presence of a large excess amount of DMPO in acetone. (top) **1** +  $^{16}\text{O}_2$ , (bottom) **1** +  $^{18}\text{O}_2$

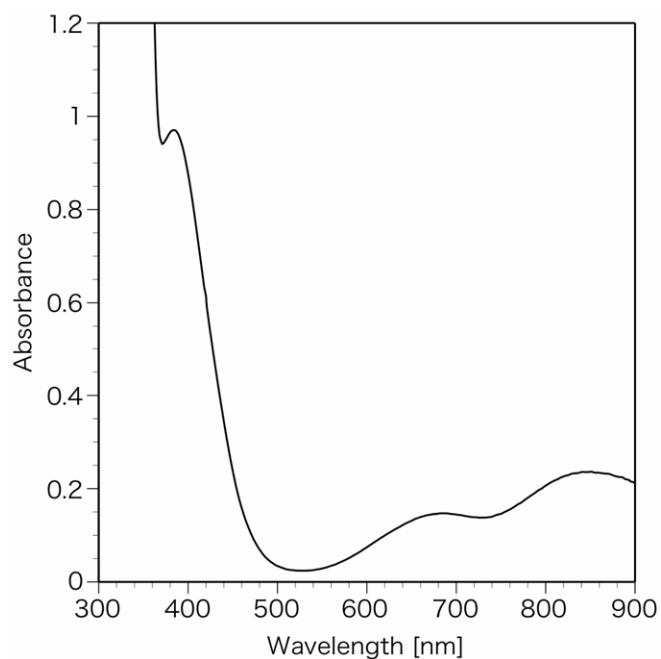

**Fig.S7** UV-vis spectrum of  $[\text{Cu}^{\text{II}}(\text{bnpa})(\text{OOH})]^+$  (1 mM) prepared by the reaction of  $[\text{Cu}^{\text{II}}(\text{bnpa})]^+$  with  $\text{H}_2\text{O}_2$  (10eq) in acetone solution at  $-40\text{ }^\circ\text{C}$ .

380 nm ( $\epsilon = 970\text{ M}^{-1}\text{cm}^{-1}$ ) : LMCT band ( $\text{OOH} \rightarrow \text{Cu}^{\text{II}}$ )

680 nm ( $\epsilon = 147\text{ M}^{-1}\text{cm}^{-1}$ ), 840 nm ( $\epsilon = 235\text{ M}^{-1}\text{cm}^{-1}$ ) : d-d band

\* The formation of  $[\text{Cu}^{\text{II}}(\text{bnpa})(\text{OOH})]^+$  was also confirmed from other spectroscopic measurements (ESI-mass, ESR, rRaman).<sup>18</sup>



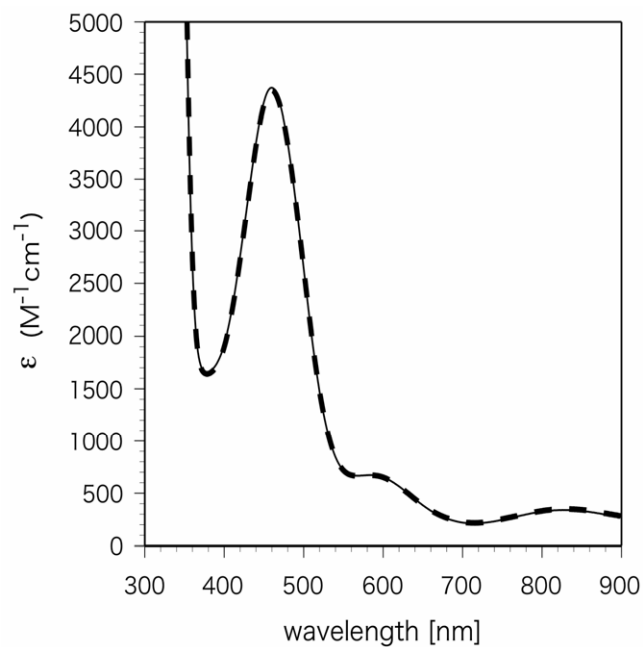

**Fig.S8** UV-vis spectral change of the reaction of **2** (0.5 mM) with TEMPO-H (50 mM) in acetone solution at -80 °C.

- (a) solid line : Spectrum of the  $[Cu^{II}(bnpa)(O_2^{2-})]^{2+}$  (**2**) after bubbling Ar gas.  
(b) dotted line : Spectrum of the solution after adding TEMPO-H.

\* Spectral change was not observed by adding TEMPO-H.

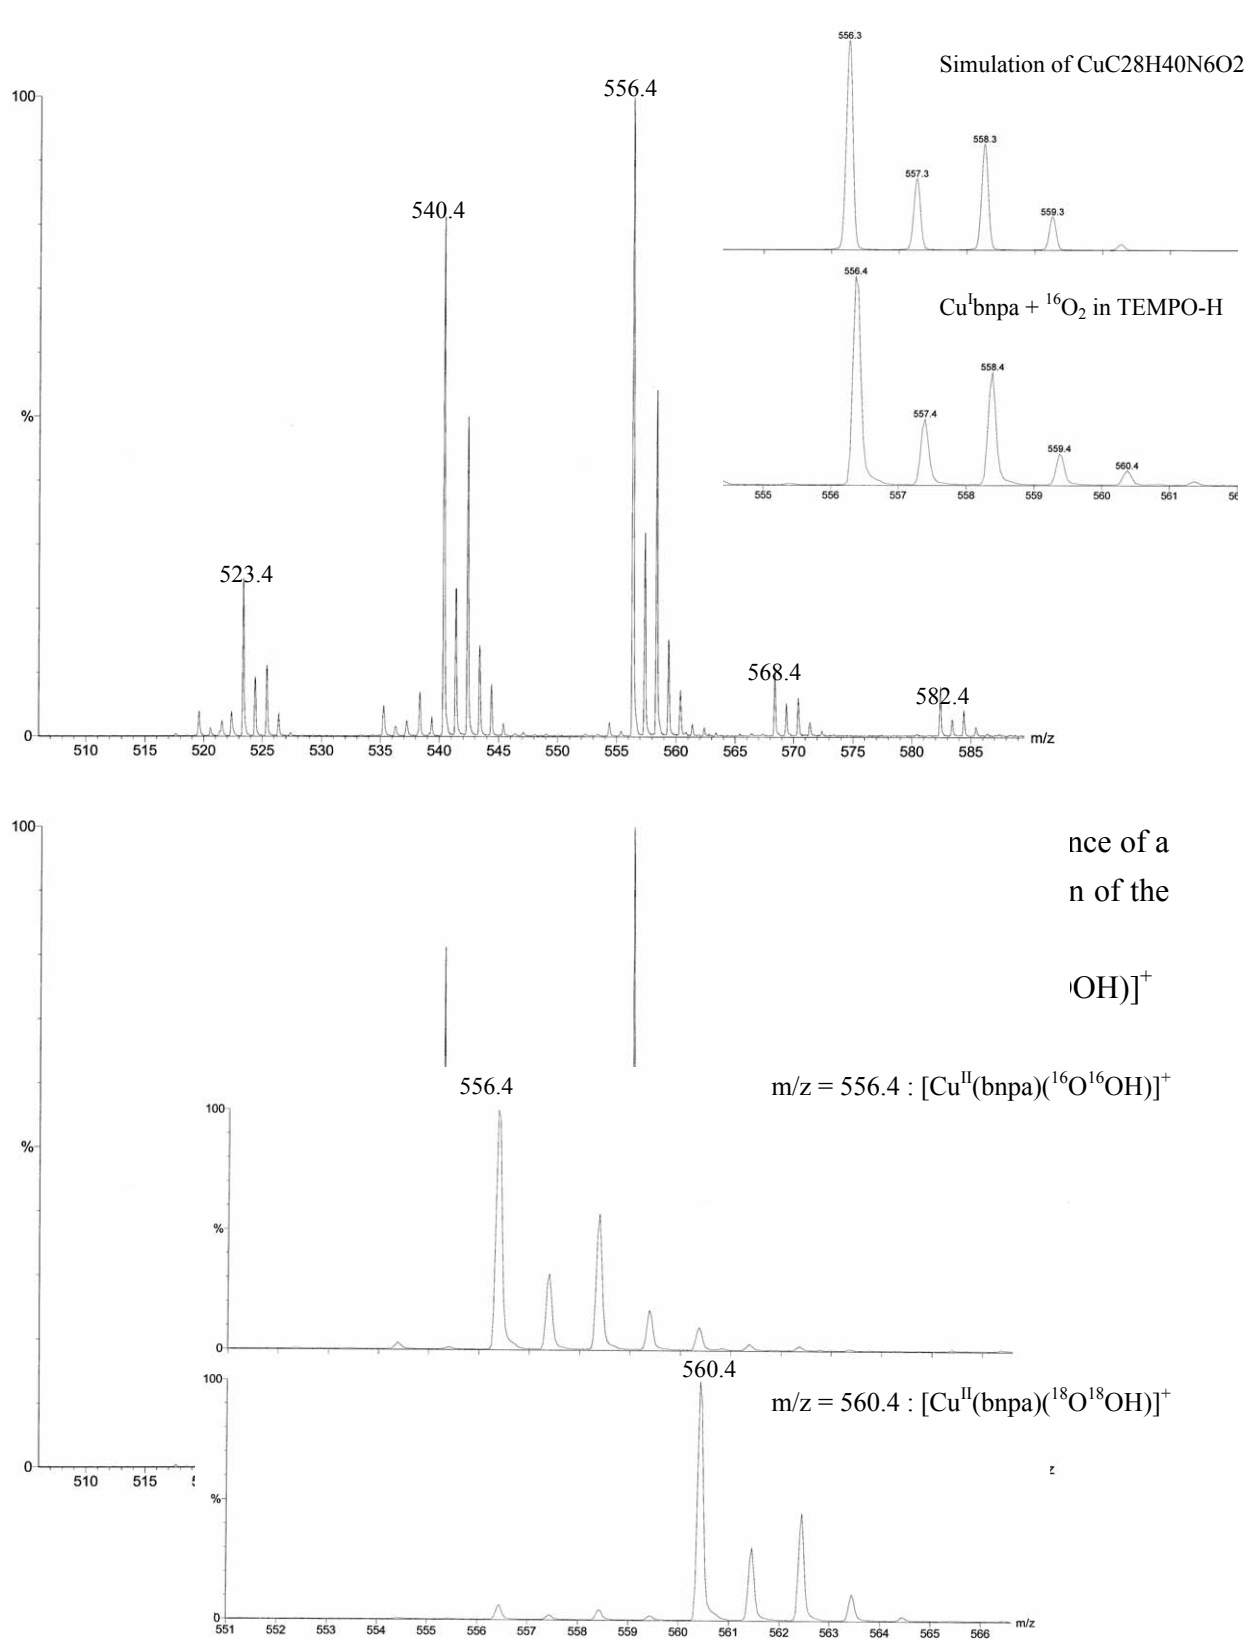

**Fig.S9(b)** Comparison of the ESI-mass spectra for the reaction solution of **1** with  ${}^{16}\text{O}_2$  and  ${}^{18}\text{O}_2$  in the presence of a large excess amount of TEMPO-H in acetone. (top) **1** +  ${}^{16}\text{O}_2$ , (bottom) **1** +  ${}^{18}\text{O}_2$

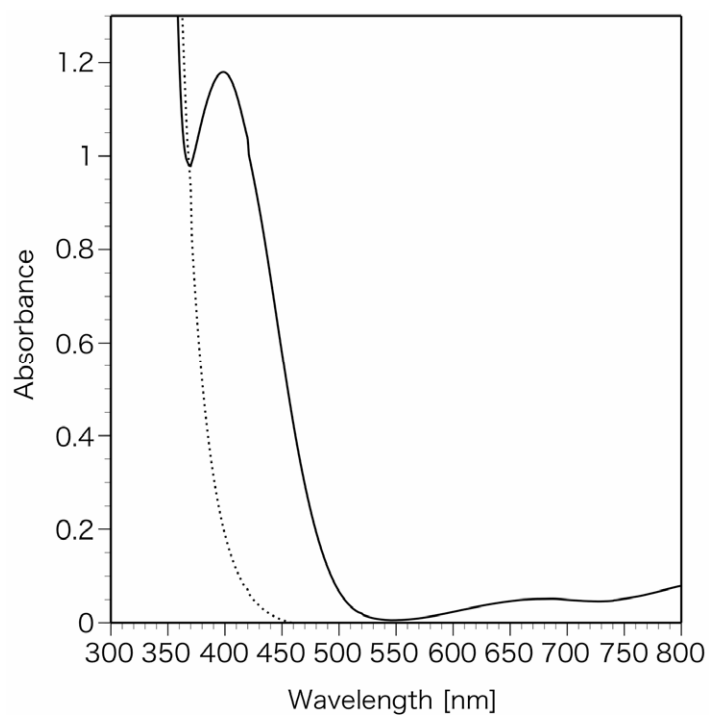

**Fig.S10** UV-vis spectral change in the reaction of **1** with O<sub>2</sub> in the presence of a large excess amount of phenylhydrazine in acetone at -80 °C.  
(dotted line) complex **1** (0.5 mM) + phenylhydrazine (100 eq)  
(solid line) after O<sub>2</sub> bubbling

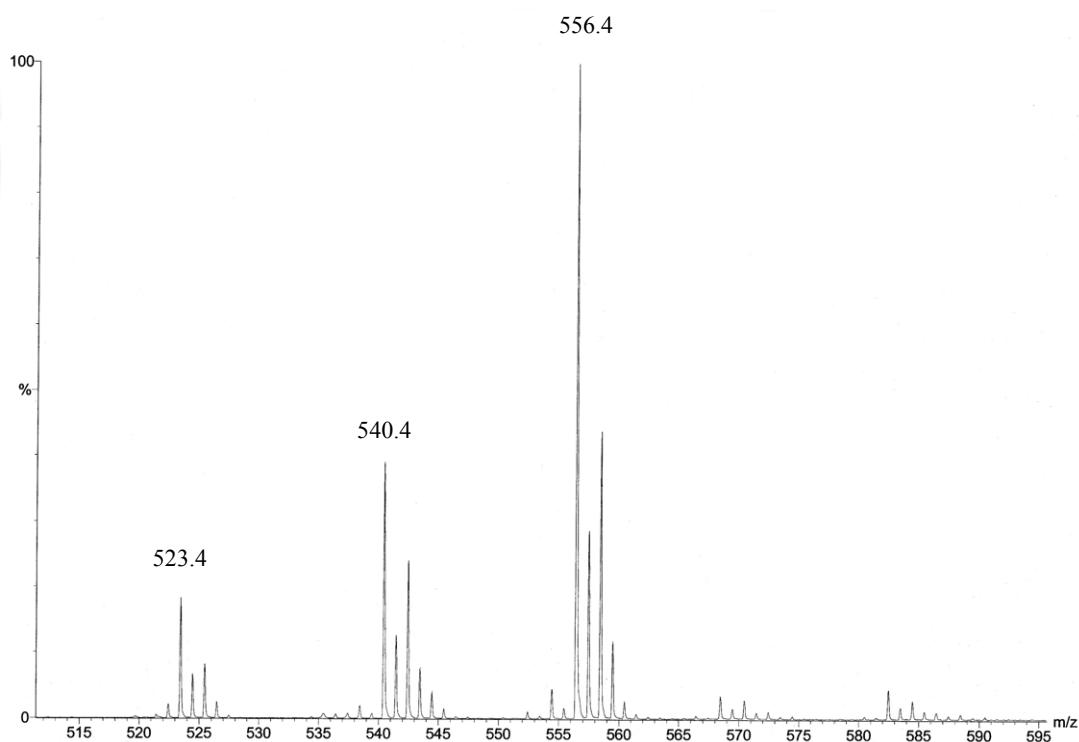

**Fig.S11(a)** ESI-mass spectra of the reaction solution of **1** with  $^{16}\text{O}_2$  in the presence of a large amount of phenylhydrazine in acetone.

$m/z = 523.4 : [\text{Cu}^{\text{I}}(\text{bnpa})]^+$ ,  $540.4 : [\text{Cu}^{\text{II}}(\text{bnpa})(\text{OH})]^+$ ,  $556.4 : [\text{Cu}^{\text{II}}(\text{bnpa})(^{16}\text{O}^{16}\text{OH})]^+$

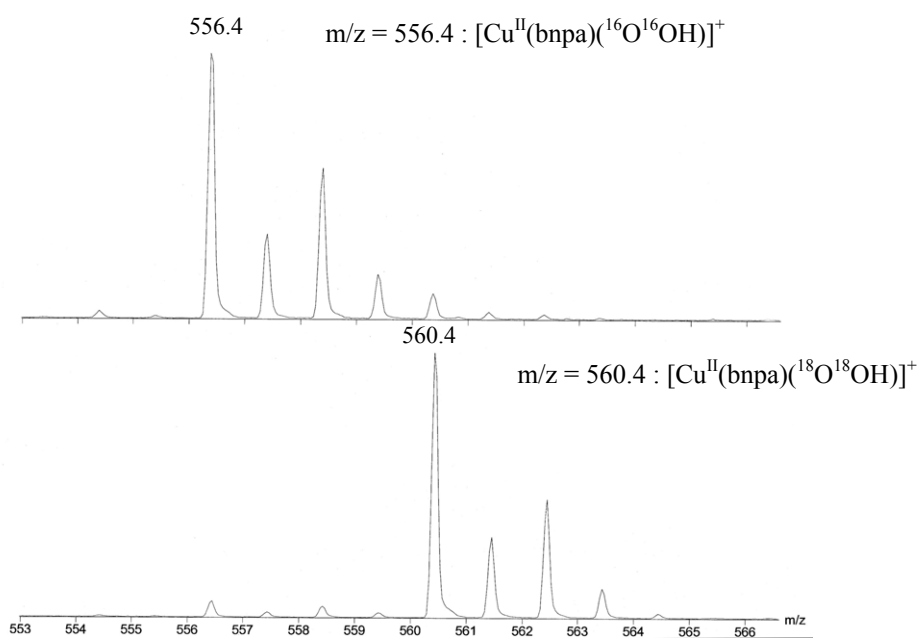

**Fig.S11(b)** Comparison of the ESI-mass spectra for the reaction solution of **1** with  $^{16}\text{O}_2$  and  $^{18}\text{O}_2$  in the presence of a large amount of Phenylhydrazine in acetone. (top) **1** +  $^{16}\text{O}_2$ , (bottom) **1** +  $^{18}\text{O}_2$
